# Supplementary material for: Titanium dioxide nanoparticles treated by UVC and IR radiation-induced positive changes in a cancer cell line treatment
Source: Research Square preprint supplement (doi:10.21203/rs.3.rs-8373569/v1), 2026-01-16
Supplement: Supplementary file 1 [file a33f6ecf415f6d625442322c.docx]

Supplementary Table 2. Titanium dioxide nanoparticle (TIO2 NPS) effect on cell viability of HuH-7 cell line and WI-38 cell line before and after exposure to IR-radiation

| **Samples** | **IC50 ( µg/ml)** | |
| --- | --- | --- |
| **HuH-7 cell line** | **WI-38 cell line** |
| 5-FU Standard | 12.80 ± 3.20 | 65.10 ± 9.18 |
| control | 60.43 ± 7.90 | 64.70 ± 12.50 |
| 2.5 m | 53.40± 7.60 | 55.50± 5.10 |
| 5 m | 57.20± 3.70 | 58.20 ± 3.80 |
| 10 m | 70.70± 15.20 | 104.30 ± 33.40 |
| 20 m | 80.10 ± 21.30 | 98.90 ± 20.20 |
| Minimum | 53.40± 7.62 | 55.50± 5.11 |
| Maximum | 80.10 ± 21.30 | 104.30 ± 33.41 |
| Mean | 65.35 ± 11.90 | ***79.2***3 *±* ***15.****63* |
| Median | 63.95 ± 11.42 | 78.55 ± 12.71 |
| Range | 26.70± 3.60 | 48.80 ± 10.50 |
| Stander deviation | 12.32 ***±*** 2.45 | 25.95 ± 3.55 |
