# Supplementary material for: Titanium dioxide nanoparticles treated by UVC and IR radiation-induced positive changes in a cancer cell line treatment
Source: Research Square preprint supplement (doi:10.21203/rs.3.rs-8373569/v1), 2026-01-16
Supplement: Supplementary file 2 [file de25afb65a32fbee54cd3a1b.docx]

Supplementary Table 1**.** Titanium dioxide nanoparticle (TIO2 NPS) effect on cell viability of HuH-7 cell line and WI-38 cell line before and after exposure to UV-radiation

| **Samples** | **IC50 (µg/ml)** | |
| --- | --- | --- |
| **HuH-7 cell line** | **WI-38 cell line** |
| 5-FU Standard | 12.80 ± 3.20 | 65.10 ± 9.18 |
| Control | 60.43± 7.90 | 64.70 ± 12.48 |
| 0.5 h | 43.70± 5.60 | 36.75 ± 9.10 |
| 1 h | 64.90± 18.20 | 86.90 ± 27.19 |
| 2 h | 58.10 ± 21.50 | 51.19 ± 17.12 |
| 3 h | 54.70± 18.12 | 40.60 ± 12.13 |
| 4 h | 36.40 ± 7.80 | 110.80 ± 1.80 |
| 6 h | 67.50 ± 16.30 | 63.50 ± 11.11 |
| 8 h | 270.70 ± 17.12 | 84.30 ± 24.27 |
| 10 h | 81.20± 9.40 | 230.90 ± 11.13 |
| Minimum | 36.40 ± 7.82 | 36.75 ± 11.40 |
| Maximum | 270.70 ± 17.12 | 110.80 ± 1.80 |
| Mean | 84.65 ± 14.31 | 88.12± 14.61 |
| Median | 61.50 ± 16.71 | 11.83± 73.90 |
| Range | 234.30 ± 15.86 | 25.40 ± 194.15 |
| Stander deviation | 76.45 ± 12.20 | 11.42± 63.01 |
